# Supplementary material for: Altruism in a Time of Crisis: Dissociable Social Valuation and Perception during COVID-19 in the United States
Source: Research Square preprint supplement (doi:10.21203/rs.3.rs-820359/v1), 2021-09-01
Supplement: Supplementary file 1 [file 24a0d86e48b644b30381e7e4.docx]

**Supplementary Information for :**

**Altruism in a Time of Crisis: Dissociable Social Valuation and Perception during COVID-19 in the United States**

Yi Luo1, Anastasia Shuster2, Dongil Chung3, Madeline O’Brien4, Matt Heflin2, Ofer Perl2, Kaustubh Kulkarni4, Soojung Na4, Vincenzo Fiore2, P. Read Montague1,5,6,7, Xiaosi Gu2,4*

1 Fralin Biomedical Research Institute at VTC, Virginia Tech, Roanoke, VA, USA, 24016

2 Department of Psychiatry, Icahn School of Medicine at Mount Sinai, New York, NY, USA, 10029

3 Department of Biomedical Engineering, Ulsan National Institute of Science and Technology, Ulsan, South Korea

4 Nash Family Department of Neuroscience, Icahn School of Medicine at Mount Sinai, New York, NY, USA, 10029

5 Wellcome Trust Centre for Neuroimaging, University College London, London, UK

6 Department of Physics, Virginia Tech, Blacksburg, VA, USA, 24061

7 Virginia Tech-Wake Forest School of Biomedical Engineering and Mechanics, Blacksburg, VA, USA, 24061

***Correspondence author**: Xiaosi Gu, PhD ([xiaosi.gu@mssm.edu](mailto:xiaosi.gu@mssm.edu))

**1 Supplementary Figures**


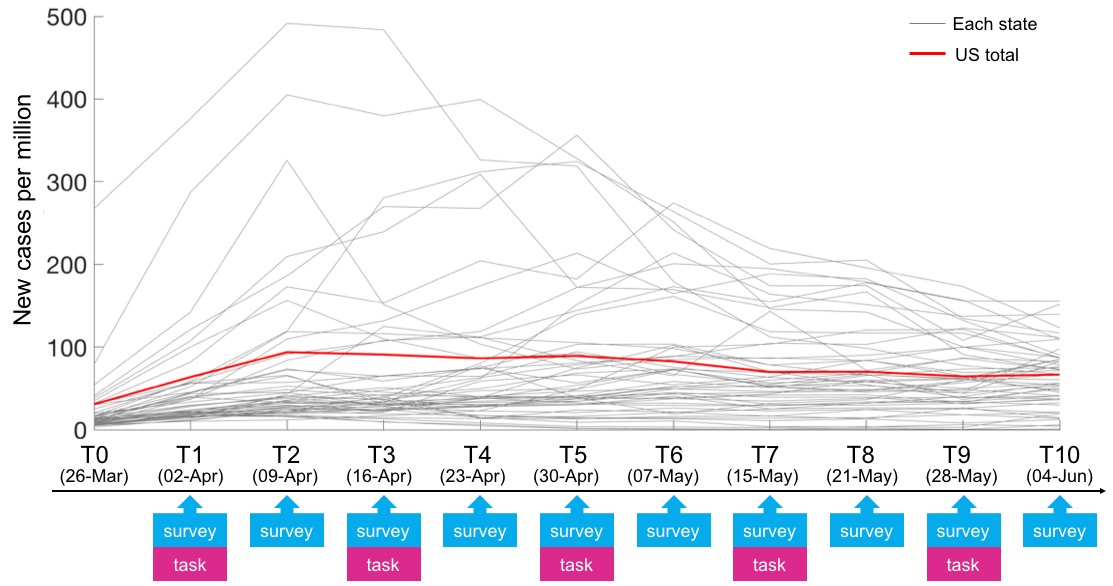


**Figure S1**. Complete data acquisition scheme of the study and new cases per million at each time point for the 2020 cohort.


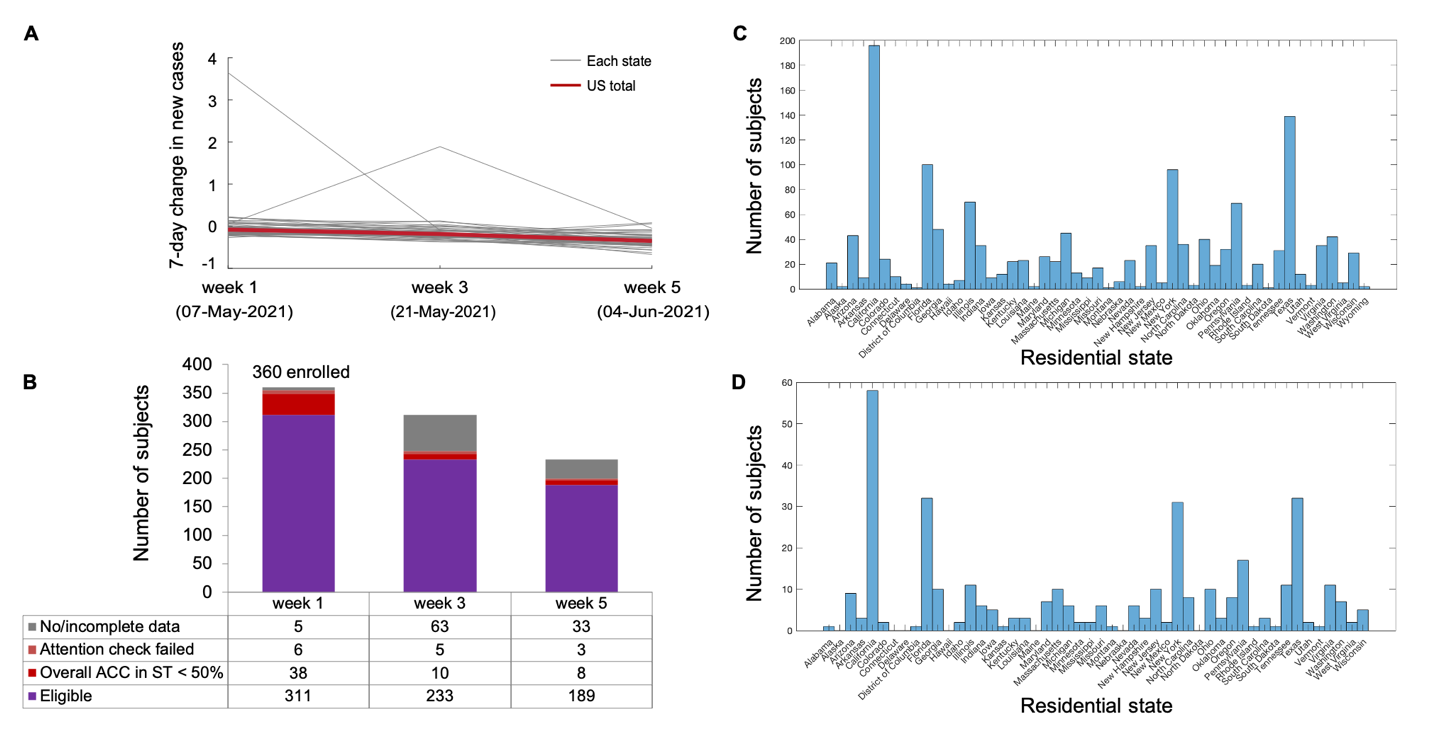


**Figure S2**. Data acquisition scheme and subject distribution for the 2021 cohort. **A**. The 7-day change in new cases over behavior acquisition time points in each state (gray lines) and the USA average (red line). **B**. Data acquisition scheme, dropouts and exclusions. ST, self-tagging task. **C**. Number of subjects in the 2020 cohort in each state. **D**. Number of subjects in the 2021 cohort in each state.

**Figure S3**. Model-based estimates for altruism in the dictator game at each time point and its association with the 7-day change in new cases in the 2021 cohort. **A**. The model-based weight on social welfare at each time point in the 2021 cohort. **B**. The model-based weight on social welfare against the 7-day change in new cases, pooling all time points in the 2021 cohort. **C**. The model-based weight on total social surplus at each time point in the 2021 cohort. **D**. The model-based weight on total social surplus against the 7-day change in new cases, pooling all time points in the 2021 cohort. **E**. The inverse temperature at each time point in the 2021 cohort. **F**. The inverse temperature against the 7-day change in new cases, pooling all time points in the 2021 cohort. Trend lines were defined by the fixed effect obtained in mixed-model regression.


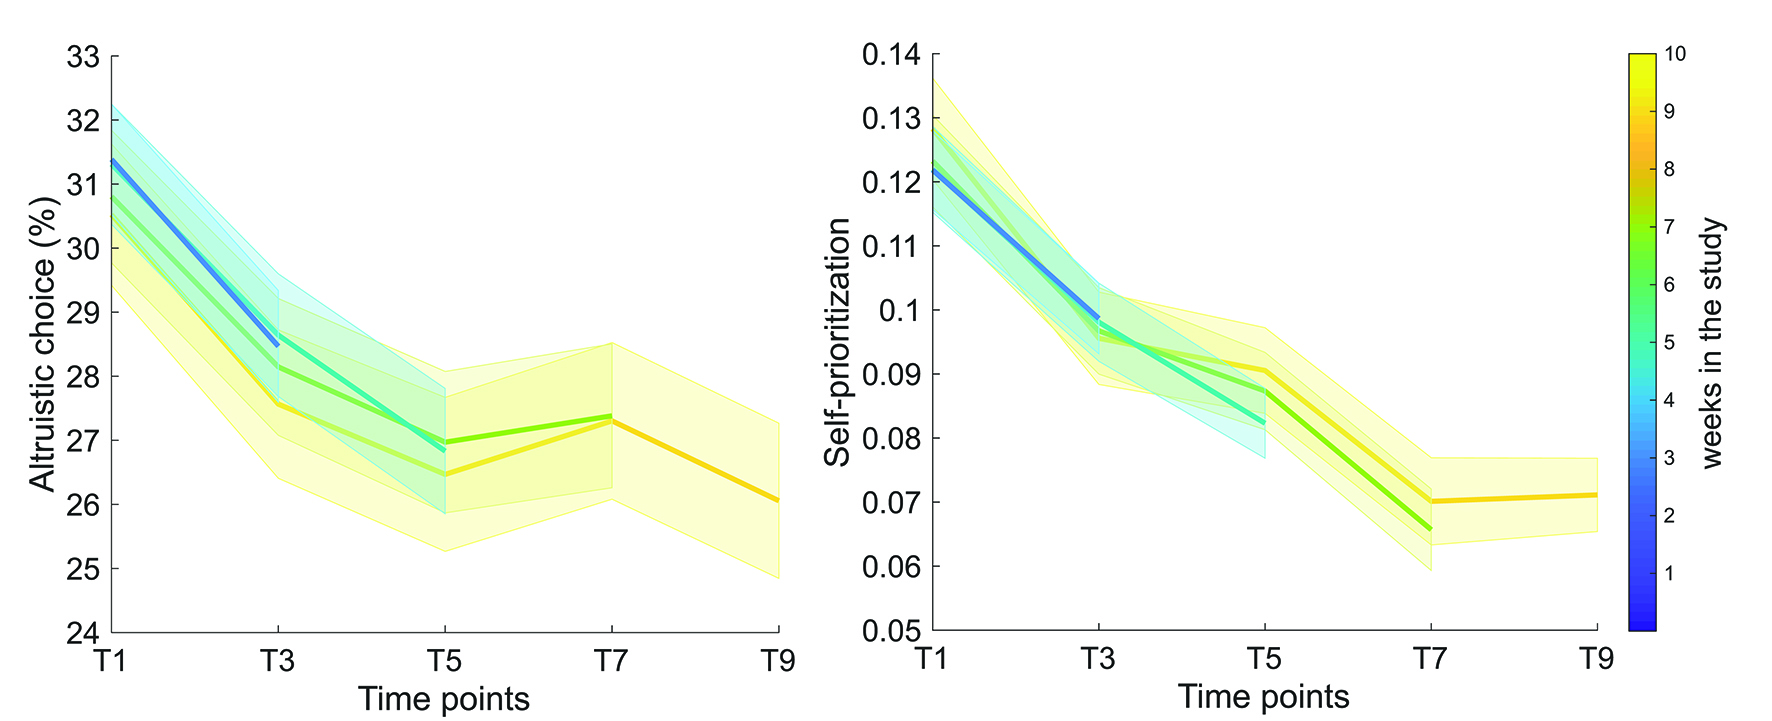


**Figure S4**. Altruistic choice and self-prioritization trends in different subsets of participants in the 2020 cohort.The blue line depicts altruistic choice (left panel) and self-prioritization (right panel) from participants with valid responses at both T1 and T3 (n = 891), including those who later dropped out or were excluded. The yellow line depicts scores from participants who successfully completed all task data collection during the 9 weeks (n = 497). All other lines depict intermediate subsets of participants. Shaded area represents standard error of the mean.

**
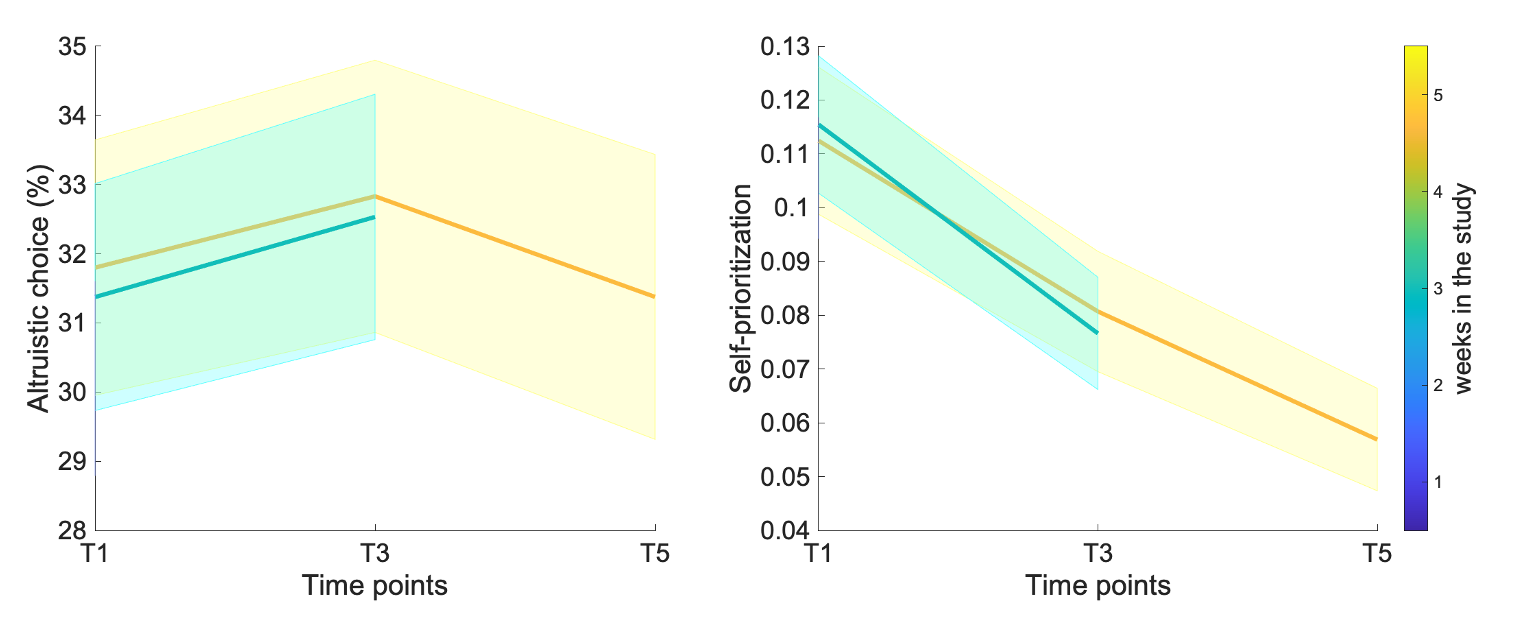
**

**Figure S5**. Altruistic choice and self-prioritization trends in different subsets of participants in the 2021 cohort.The blue line depicts altruistic choice (left panel) and self-prioritization (right panel) from participants with valid responses on both week 1 and week 3 of data collection (n = 233), including those who later dropped out or were excluded. The yellow line depicts scores from participants who successfully completed all task data collection during the 5 weeks (n = 189). Shaded area represents standard error of the mean.

**2 Supplementary Tables**

**Table S1**. linear mixed-effects regression results for altruism predicted by 7-day change in new cases in the 2020 cohort.

| **Predictor** | ***β#*** | ***standard error*** | ***95% confidence interval*** | | ***degrees of freedom*** | ***t*** | ***p*** | |
| --- | --- | --- | --- | --- | --- | --- | --- | --- |
| ***lower*** | ***upper*** |
| altruistic choice ~ 7-day change in new cases + time + sex + age + (time | participant) | | | | | | | |
| 7-day change | 0.013 | 0.004 | 0.004 | 0.021 | 1754.0 | 2.925 | 0.003 | |
| time | -0.005 | 0.003 | -0.011 | 0.001 | 799.1 | -1.705 | 0.089 | |
| sex (female vs. male) | -0.088 | 0.020 | -0.128 | -0.048 | 497.0 | -4.336 | <0.001 | |
| sex (other vs. male) | -0.150 | 0.161 | -0.465 | 0.164 | 497.1 | -0.937 | 0.349 | |
| age | -3.60E-04 | 0.001 | -0.002 | 0.001 | 497.1 | -0.459 | 0.646 | |
| γ ~ 7-day change in new cases + time + sex + age + (time | participant) | | | | | | | |
| 7-day change | 0.021 | 0.007 | 0.008 | 0.034 | 1765.0 | 3.193 | 0.001 | |
| time | -0.005 | 0.004 | -0.014 | 0.003 | 828.4 | -1.249 | 0.212 | |
| sex (female vs. male) | -0.067 | 0.027 | -0.120 | -0.013 | 497.0 | -2.452 | 0.015 | |
| sex (other vs. male) | -0.224 | 0.215 | -0.644 | 0.197 | 497.0 | -1.042 | 0.298 | |
| age | -0.001 | 0.001 | -0.003 | 0.001 | 497.0 | -0.731 | 0.465 | |
| δ ~ 7-day change in new cases + time + sex + age + (time | participant) | | | | | | | |
| 7-day change | -0.006 | 0.006 | -0.018 | 0.007 | 1869.0 | -0.925 | 0.355 | |
| time | 0.008 | 0.004 | 0.001 | 0.016 | 901.9 | 2.215 | 0.027 | |
| sex (female vs. male) | -0.139 | 0.022 | -0.182 | -0.095 | 496.9 | -6.251 | <0.001 | |
| sex (other vs. male) | -0.233 | 0.175 | -0.575 | 0.109 | 497.0 | -1.336 | 0.182 | |
| age | -0.001 | 0.001 | -0.003 | 0.001 | 497.0 | -1.216 | 0.225 | |
| τ ~ 7-day change in new cases + time + sex + age + (time | participant) | | | | | | | |
| 7-day change | -0.107 | 0.044 | -0.193 | -0.021 | 1918.0 | -2.437 | 0.015 | |
| time | 0.131 | 0.025 | 0.083 | 0.179 | 961.7 | 5.306 | <0.001 | |
| sex (female vs. male) | -0.293 | 0.115 | -0.518 | -0.068 | 496.8 | -2.556 | 0.011 | |
| sex (other vs. male) | 0.630 | 0.903 | -1.139 | 2.400 | 496.9 | 0.698 | 0.485 | |
| age | 0.002 | 0.004 | -0.006 | 0.011 | 496.8 | 0.542 | 0.588 | |

# unstandardized coefficient

**Table S2**. linear mixed-effects regression results for altruism predicted by new case number in the 2020 cohort.

| **Predictor** | ***β#*** | ***standard error*** | ***95% confidence interval*** | | ***degrees of freedom*** | | ***t*** | ***p*** |
| --- | --- | --- | --- | --- | --- | --- | --- | --- |
| ***lower*** | ***upper*** | |  |  |  |
| altruistic choice ~ new case number + time + sex + age + (time | participant) | | | | | | | | | |
| new case number | -8.36E-05 | 5.79E-05 | -1.97E-04 | 3.00E-05 | | 1433.0 | -1.445 | 0.149 |
| time | -0.009 | 0.003 | -0.014 | -0.004 | | 496.0 | -3.612 | <0.001 |
| sex (female vs. male) | -0.089 | 0.020 | -0.129 | -0.048 | | 497.0 | -4.339 | <0.001 |
| sex (other vs. male) | -0.145 | 0.161 | -0.461 | 0.172 | | 498.2 | -0.902 | 0.368 |
| age | -4.38E-04 | 0.001 | -0.002 | 0.001 | | 499.1 | -0.557 | 0.578 |
| γ ~ new case number + time + sex + age + (time | participant) | | | | | | | | | |
| new case number | -1.66E-04 | 8.72E-05 | -3.37E-04 | 5.07E-06 | | 1481.0 | -1.902 | 0.057 |
| time | -0.012 | 0.004 | -0.020 | -0.005 | | 496.6 | -3.367 | 0.001 |
| sex (female vs. male) | -0.067 | 0.027 | -0.120 | -0.014 | | 497.0 | -2.457 | 0.014 |
| sex (other vs. male) | -0.214 | 0.215 | -0.634 | 0.207 | | 497.9 | -0.995 | 0.320 |
| age | -0.001 | 0.001 | -0.003 | 0.001 | | 499.0 | -0.840 | 0.402 |
| δ ~ new case number + time + sex + age + (time | participant) | | | | | | | | | |
| new case number | 8.15E-05 | 7.33E-05 | -6.22E-05 | 2.25E-04 | | 1099.0 | 1.111 | 0.267 |
| time | 0.010 | 0.003 | 0.004 | 0.017 | | 496.9 | 3.301 | 0.001 |
| sex (female vs. male) | -0.139 | 0.022 | -0.182 | -0.095 | | 497.0 | -6.253 | <0.001 |
| sex (other vs. male) | -0.241 | 0.175 | -0.583 | 0.101 | | 498.6 | -1.380 | 0.168 |
| age | -0.001 | 0.001 | -0.003 | 0.001 | | 499.7 | -1.137 | 0.256 |
| τ ~ new case number + time + sex + age + (time | participant) | | | | | | | | | |
| new case number | 0.001 | 4.67E-04 | -3.90E-05 | 0.002 | | 1052.0 | 1.876 | 0.061 |
| time | 0.167 | 0.020 | 0.128 | 0.206 | | 497.1 | 8.368 | <0.001 |
| sex (female vs. male) | -0.293 | 0.115 | -0.517 | -0.068 | | 497.0 | -2.557 | 0.011 |
| sex (other vs. male) | 0.573 | 0.902 | -1.194 | 2.340 | | 498.5 | 0.635 | 0.526 |
| age | 0.003 | 0.004 | -0.006 | 0.012 | | 500.0 | 0.693 | 0.489 |

# unstandardized coefficient

**Table S3**. linear mixed-effects regression results for self-prioritization in the 2020 cohort.

| **Predictor** | ***β*** | ***standard error*** | ***95% confidence interval*** | | | ***degrees of freedom*** | | ***t*** | | ***p*** |
| --- | --- | --- | --- | --- | --- | --- | --- | --- | --- | --- |
| ***lower*** | ***upper*** |  | |  | |  | |
| self-prioritization ~ 7-day change in new cases + time + sex + age + (time | participant) | | | | | | | | | | |
| 7-day change | 0.015 | 0.005 | 0.006 | 0.025 | 2153.0 | | 3.099 | | 0.002 | |
| time | -0.009 | 0.003 | -0.014 | -0.004 | 1605.0 | | -3.404 | | 0.001 | |
| sex (female vs. male) | 0.002 | 0.008 | -0.013 | 0.017 | 512.2 | | 0.305 | | 0.761 | |
| sex (other vs. male) | -0.067 | 0.061 | -0.187 | 0.052 | 512.3 | | -1.111 | | 0.267 | |
| age | 0.001 | 2.97E-04 | 0.001 | 0.002 | 512.1 | | 4.690 | | <0.001 | |
| self-prioritization ~ new case number + time + sex + age + (time | participant) | | | | | | | | | | |
| new case number | -8.72E-06 | 4.49E-05 | -9.68E-05 | 7.93E-05 | 1063.0 | | -0.194 | | 0.846 | |
| time | -0.014 | 0.002 | -0.018 | -0.010 | 1204.0 | | -6.849 | | <0.001 | |
| sex (female vs. male) | 0.002 | 0.008 | -0.013 | 0.018 | 512.4 | | 0.323 | | 0.747 | |
| sex (other vs. male) | -0.069 | 0.061 | -0.188 | 0.051 | 513.8 | | -1.130 | | 0.259 | |
| age | 0.001 | 2.98E-04 | 0.001 | 0.002 | 516.0 | | 4.663 | | <0.001 | |

# unstandardized coefficient

**Table S4**. linear mixed-effects regression results for altruism predicted by self-prioritization in the 2020 cohort.

| **Predictor** | ***β#*** | ***standard error*** | ***95% confidence interval*** | | ***degrees of freedom*** | | ***t*** | | | ***p*** | |
| --- | --- | --- | --- | --- | --- | --- | --- | --- | --- | --- | --- |
| ***lower*** | ***upper*** |  | |  | | |  | |
| altruistic choice ~ self-prioritization in new cases + time + sex + age + (time | participant) | | | | | | | | | | | |
| self-prioritization | -0.009 | 0.020 | -0.047 | 0.029 | 1928.0 | -0.467 | | | 0.641 | | |
| time | -0.009 | 0.003 | -0.014 | -0.004 | 507.1 | -3.628 | | | <0.001 | | |
| sex (female vs. male) | -0.088 | 0.020 | -0.128 | -0.048 | 497.0 | -4.330 | | | <0.001 | | |
| sex (other vs. male) | -0.155 | 0.161 | -0.469 | 0.160 | 497.1 | -0.964 | | | 0.336 | | |
| age | -3.66E-04 | 0.001 | -0.002 | 0.001 | 498.1 | -0.466 | | | 0.641 | | |
| γ ~ self-prioritization + time + sex + age + (time | participant) | | | | | | | | | | | | |
| self-prioritization | -0.005 | 0.030 | -0.063 | 0.053 | 1971.0 | | -0.174 | | | 0.862 | |
| time | -0.012 | 0.004 | -0.020 | -0.005 | 507.6 | | -3.342 | | | 0.001 | |
| sex (female vs. male) | -0.067 | 0.027 | -0.120 | -0.013 | 497.0 | | -2.447 | | | 0.015 | |
| sex (other vs. male) | -0.228 | 0.215 | -0.649 | 0.193 | 497.1 | | -1.062 | | | 0.289 | |
| age | -0.001 | 0.001 | -0.003 | 0.001 | 498.5 | | -0.736 | | | 0.462 | |
| δ ~ self-prioritization + time + sex + age + (time | participant) | | | | | | | |  | | |  | |
| self-prioritization | -0.026 | 0.028 | -0.081 | 0.029 | 2098.0 | | -0.914 | | | 0.361 | |
| time | 0.010 | 0.003 | 0.004 | 0.016 | 510.0 | | 3.146 | | | 0.002 | |
| sex (female vs. male) | -0.138 | 0.022 | -0.182 | -0.095 | 497.1 | | -6.246 | | | <0.001 | |
| sex (other vs. male) | -0.234 | 0.174 | -0.575 | 0.108 | 497.2 | | -1.339 | | | 0.181 | |
| age | -0.001 | 0.001 | -0.003 | 0.001 | 498.9 | | -1.165 | | | 0.245 | |
| τ ~ self-prioritization + time + sex + age + (time | participant) | | | | | | | |  | | |  | |
| self-prioritization | 0.165 | 0.190 | -0.209 | 0.538 | 2234.0 | | 0.864 | | | 0.388 | |
| time | 0.169 | 0.020 | 0.129 | 0.208 | 511.5 | | 8.377 | | | <0.001 | |
| sex (female vs. male) | -0.294 | 0.115 | -0.519 | -0.070 | 496.5 | | -2.568 | | | 0.011 | |
| sex (other vs. male) | 0.666 | 0.902 | -1.102 | 2.434 | 496.7 | | 0.738 | | | 0.461 | |
| age | 0.002 | 0.004 | -0.006 | 0.011 | 499.7 | | 0.511 | | | 0.610 | |

# unstandardized coefficient

**Table S5**. linear mixed-effects regression results for change in altruism predicted by change in self-prioritization in the 2020 cohort.

| **Predictor** | ***β#*** | ***standard error*** | ***95% confidence interval*** | | | | ***degrees of freedom*** | | | ***t*** | | | ***p*** | |
| --- | --- | --- | --- | --- | --- | --- | --- | --- | --- | --- | --- | --- | --- | --- |
| ***lower*** | ***upper*** | |  | | |  | | |  | | |
| change in altruistic choice ~ change in self-prioritization + time + sex + age + (time | participant) | | | | | | | | | | | | | | |
| change in self-prioritization | -0.022 | 0.018 | -0.058 | | 0.014 | | | 1988 | | | -1.184 | | | 0.237 |
| time | 0.007 | 0.003 | 0.001 | | 0.014 | | | 1988 | | | 2.223 | | | 0.026 |
| sex (female vs. male) | 0.012 | 0.007 | -0.002 | | 0.027 | | | 1988 | | | 1.662 | | | 0.097 |
| sex (other vs. male) | -0.084 | 0.058 | -0.197 | | 0.029 | | | 1988 | | | -1.453 | | | 0.146 |
| age | 4.78E-04 | 2.82E-04 | -7.43E-05 | | 0.001 | | | 1988 | | | 1.696 | | | 0.090 |
| change in γ ~ change in self-prioritization + time + sex + age + (time | participant) | | | | | | | | | | | | | | |
| change in self-prioritization | -0.039 | 0.028 | -0.095 | 0.017 | | 1988 | | | -1.374 | | | 0.170 | | |
| time | 0.012 | 0.005 | 0.002 | 0.022 | | 1988 | | | 2.408 | | | 0.016 | | |
| sex (female vs. male) | 0.009 | 0.011 | -0.014 | 0.031 | | 1988 | | | 0.755 | | | 0.450 | | |
| sex (other vs. male) | -0.084 | 0.089 | -0.258 | 0.090 | | 1988 | | | -0.948 | | | 0.343 | | |
| age | 3.90E-04 | 4.34E-04 | -4.60E-04 | 0.001 | | 1988 | | | 0.899 | | | 0.369 | | |
| change in δ ~ change in self-prioritization + time + sex + age + (time | participant) | | | | | | | | | | | | | | |
| change in self-prioritization | -0.027 | 0.028 | -0.081 | 0.027 | | 1988 | | | -0.972 | | | 0.331 | | |
| time | -0.011 | 0.005 | -0.021 | -0.002 | | 1988 | | | -2.352 | | | 0.019 | | |
| sex (female vs. male) | -0.008 | 0.011 | -0.029 | 0.014 | | 1988 | | | -0.712 | | | 0.476 | | |
| sex (other vs. male) | 0.004 | 0.086 | -0.165 | 0.173 | | 1988 | | | 0.043 | | | 0.965 | | |
| age | 0.001 | 4.21E-04 | 4.92E-05 | 0.002 | | 1988 | | | 2.077 | | | 0.038 | | |
| change in τ ~ change in self-prioritization + time + sex + age + ( time | participant) | | | | | | | | | | | | | | |
| change in self-prioritization | 0.289 | 0.192 | -0.087 | 0.665 | | 1988 | | | 1.508 | | | 0.132 | | |
| time | -0.095 | 0.034 | -0.161 | -0.029 | | 1988 | | | -2.803 | | | 0.005 | | |
| sex (female vs. male) | -0.074 | 0.076 | -0.223 | 0.075 | | 1988 | | | -0.970 | | | 0.332 | | |
| sex (other vs. male) | 0.368 | 0.600 | -0.808 | 1.543 | | 1988 | | | 0.613 | | | 0.540 | | |
| age | 0.000 | 0.003 | -0.006 | 0.005 | | 1988 | | | -0.111 | | | 0.911 | | |

# unstandardized coefficient

**Table S6**. linear mixed-effects regression results for altruism predicted by 7-day change in new cases in the 2021 cohort.

| **Predictor** | ***β#*** | ***standard error*** | ***95% confidence interval*** | | ***degrees of freedom*** | ***t*** | ***p*** |
| --- | --- | --- | --- | --- | --- | --- | --- |
| ***lower*** | ***upper*** |  |  |  |
| altruistic choice ~ 7-day change in new cases + time + sex + age + (time | participant) | | | | | | | |
| 7-day change | -0.017 | 0.014 | -0.045 | 0.011 | 343.6 | -1.207 | 0.228 |
| time | -0.006 | 0.007 | -0.020 | 0.008 | 220.7 | -0.821 | 0.412 |
| sex (female vs. male) | -0.040 | 0.036 | -0.111 | 0.032 | 188.8 | -1.090 | 0.277 |
| age | -0.002 | 0.002 | -0.006 | 0.001 | 188.7 | -1.348 | 0.179 |
| γ ~ 7-day change in new cases + time + sex + age + (time | participant) | | | | | | | |
| 7-day change | -0.028 | 0.022 | -0.071 | 0.016 | 338.4 | -1.257 | 0.210 |
| time | -0.003 | 0.011 | -0.024 | 0.018 | 219.3 | -0.275 | 0.783 |
| sex (female vs. male) | -0.026 | 0.047 | -0.118 | 0.067 | 189.1 | -0.545 | 0.586 |
| age | -0.003 | 0.002 | -0.007 | 0.002 | 189.0 | -1.144 | 0.254 |
| δ ~ 7-day change in new cases + time + sex + age + (time | participant) | | | | | | | |
| 7-day change | 0.019 | 0.023 | -0.027 | 0.064 | 328.7 | 0.808 | 0.420 |
| time | 0.029 | 0.012 | 0.006 | 0.051 | 220.2 | 2.475 | 0.014 |
| sex (female vs. male) | -0.034 | 0.038 | -0.109 | 0.040 | 188.9 | -0.909 | 0.365 |
| age | -0.003 | 0.002 | -0.006 | 0.001 | 188.7 | -1.493 | 0.137 |
| τ ~ 7-day change in new cases + time + sex + age + (time | participant) | | | | | | | |
| 7-day change | 0.008 | 0.140 | -0.267 | 0.282 | 342.3 | 0.054 | 0.957 |
| time | 0.295 | 0.069 | 0.159 | 0.431 | 220.7 | 4.253 | <0.001 |
| sex (female vs. male) | -0.161 | 0.198 | -0.550 | 0.227 | 189.2 | -0.815 | 0.416 |
| age | 0.010 | 0.009 | -0.009 | 0.028 | 189.1 | 1.044 | 0.298 |

# unstandardized coefficient

**Table S7**. linear mixed-effects regression results for altruism predicted by new case number in the 2021 cohort.

| **Predictor** | ***β*** | ***standard error*** | ***95% confidence interval*** | | ***degrees of freedom*** | ***t*** | ***p*** |
| --- | --- | --- | --- | --- | --- | --- | --- |
| ***lower*** | ***upper*** |
| altruistic choice ~ new case number + time + sex + age + (time | participant) | | | | | | | | |
| new case number | -3.34E-07 | 1.97E-04 | -3.87E-04 | 3.87E-04 | 287.6 | -0.002 | 0.999 |
| time | -0.002 | 0.011 | -0.023 | 0.019 | 282.7 | -0.202 | 0.840 |
| sex (female vs. male) | -0.038 | 0.036 | -0.110 | 0.033 | 188.7 | -1.059 | 0.291 |
| age | -0.002 | 0.002 | -0.006 | 0.001 | 188.5 | -1.380 | 0.169 |
| γ ~ new case number + time + sex + age + (time | participant) | | | | | | | | |
| new case number | -4.88E-05 | 3.01E-04 | -0.001 | 0.001 | 290.5 | -0.162 | 0.871 |
| time | 0.001 | 0.016 | -0.030 | 0.032 | 277.6 | 0.061 | 0.951 |
| sex (female vs. male) | -0.024 | 0.047 | -0.116 | 0.068 | 189.0 | -0.515 | 0.607 |
| age | -0.003 | 0.002 | -0.007 | 0.002 | 188.9 | -1.170 | 0.243 |
| δ ~ new case number + time + sex + age + (time | participant) | | | | | | | | |
| new case number | 0.034 | 0.016 | 0.002 | 0.066 | 293.1 | 2.104 | 0.036 |
| time | 2.27E-04 | 2.94E-04 | -3.49E-04 | 0.001 | 276.0 | 0.771 | 0.441 |
| sex (female vs. male) | -0.037 | 0.038 | -0.111 | 0.038 | 189.4 | -0.964 | 0.336 |
| age | -0.003 | 0.002 | -0.006 | 0.001 | 189.2 | -1.448 | 0.149 |
| τ ~ new case number + time + sex + age + (time | participant) | | | | | | | | |
| new case number | -0.001 | 0.002 | -0.004 | 0.003 | 289.3 | -0.378 | 0.705 |
| time | 0.266 | 0.097 | 0.075 | 0.456 | 300.1 | 2.726 | 0.007 |
| sex (female vs. male) | -0.159 | 0.198 | -0.546 | 0.228 | 187.0 | -0.805 | 0.422 |
| age | 0.010 | 0.009 | -0.009 | 0.028 | 186.8 | 1.036 | 0.302 |

# unstandardized coefficient

**Table S8**. linear mixed-effects regression results for self-prioritization in the 2021 cohort.

| **Predictor** | ***β#*** | ***standard error*** | ***95% confidence interval*** | | ***degrees of freedom*** | ***t*** | ***p*** |
| --- | --- | --- | --- | --- | --- | --- | --- |
| ***lower*** | ***upper*** |
| self-prioritization ~ 7-day change in new cases + time + sex + age + (time | participant) | | | | | | | | |
| 7-day change | -0.019 | 0.017 | -0.054 | 0.015 | 368.6 | -1.100 | 0.272 |
| time | -0.006 | 0.015 | -0.035 | 0.023 | 214.7 | -0.398 | 0.691 |
| sex (female vs. male) | 0.002 | 0.001 | 0.000 | 0.003 | 214.3 | 2.562 | 0.011 |
| age | -0.032 | 0.009 | -0.049 | -0.015 | 281.2 | -3.700 | <0.001 |
| self-prioritization ~ new case number + time + sex + age + (time | participant) | | | | | | | | |
| new case number | 1.06E-05 | 1.89E-04 | -3.61E-04 | 3.82E-04 | 288.5 | 0.056 | 0.955 |
| time | -0.005 | 0.015 | -0.035 | 0.024 | 214.2 | -0.363 | 0.717 |
| sex (female vs. male) | 0.002 | 0.001 | 4.13E-04 | 0.003 | 214.0 | 2.540 | 0.012 |
| age | -0.027 | 0.011 | -0.049 | -0.005 | 361.4 | -2.444 | 0.015 |

# unstandardized coefficient

**Table S9**. linear mixed-effects regression results for altruism predicted by self-prioritization in the 2021 cohort.

| **Predictor** | ***β#*** | ***standard error*** | ***95% confidence interval*** | | ***degrees of freedom*** | | ***t*** | | ***p*** |
| --- | --- | --- | --- | --- | --- | --- | --- | --- | --- |
| ***lower*** | ***upper*** |
| altruistic choice ~ self-prioritization in new cases + time + sex + age + (time | participant) | | | | | | | |  | |
| self-prioritization | 0.040 | 0.037 | -0.033 | 0.113 | 391.100 | | 1.079 | | 0.281 |
| time | -0.001 | 0.006 | -0.014 | 0.012 | 195.300 | | -0.154 | | 0.878 |
| sex (female vs. male) | -0.038 | 0.036 | -0.109 | 0.033 | 188.600 | | -1.051 | | 0.295 |
| age | -0.002 | 0.002 | -0.006 | 0.001 | 188.900 | | -1.408 | | 0.161 |
| γ ~ self-prioritization + time + sex + age + (time | participant) | | | | | |  |  | |  |
| self-prioritization | 0.101 | 0.057 | -0.012 | 0.214 | 412.200 | | 1.758 | | 0.080 |
| time | 0.006 | 0.010 | -0.013 | 0.025 | 195.400 | | 0.613 | | 0.541 |
| sex (female vs. male) | -0.024 | 0.047 | -0.116 | 0.069 | 188.500 | | -0.505 | | 0.614 |
| age | -0.003 | 0.002 | -0.007 | 0.002 | 189.100 | | -1.234 | | 0.219 |
| δ ~ self-prioritization + time + sex + age + (time | participant) | | | | | |  |  | |  |
| self-prioritization | 0.071 | 0.061 | -0.048 | 0.190 | 442.400 | | 1.163 | | 0.245 |
| time | 0.026 | 0.010 | 0.006 | 0.047 | 194.900 | | 2.529 | | 0.012 |
| sex (female vs. male) | -0.035 | 0.038 | -0.110 | 0.040 | 188.500 | | -0.919 | | 0.359 |
| age | -0.003 | 0.002 | -0.006 | 0.001 | 189.300 | | -1.522 | | 0.130 |
| τ ~ self-prioritization + time + sex + age + (time | participant) | | | | | |  |  | |  |
| self-prioritization | -0.266 | 0.360 | -0.973 | 0.440 | 460.200 | | -0.739 | | 0.460 |
| time | 0.286 | 0.063 | 0.162 | 0.411 | 195.200 | | 4.515 | | <0.001 |
| sex (female vs. male) | -0.163 | 0.198 | -0.552 | 0.225 | 188.700 | | -0.824 | | 0.411 |
| age | 0.010 | 0.009 | -0.008 | 0.029 | 189.900 | | 1.088 | | 0.278 |

# unstandardized coefficient

**Table S10**. Monetary allocations in each trial

| **selfish option** | | **altruistic option** | | **catch trial#** |
| --- | --- | --- | --- | --- |
| **self** | **other** | **self** | **other** |
| 3.5 | 4 | 2 | 19 | n |
| 4 | 3 | 3 | 9 | n |
| 5 | 5 | 7 | 5.5 | y |
| 5 | 7 | 6 | 8 | y |
| 6 | 1 | 5 | 19 | n |
| 6 | 2 | 4 | 4 | n |
| 6 | 3 | 5 | 11 | n |
| 6 | 5 | 5 | 14 | n |
| 6 | 7 | 4 | 8 | n |
| 6 | 10 | 5 | 13 | n |
| 7 | 1 | 6 | 16 | n |
| 7 | 3 | 3 | 19 | n |
| 8 | 6 | 6 | 20 | n |
| 8 | 10 | 7 | 12 | n |
| 9 | 2 | 6 | 17 | n |
| 9 | 2 | 5 | 5 | n |
| 10 | 1 | 5 | 14 | n |
| 10 | 5 | 7.5 | 7 | n |
| 10 | 5 | 15 | 7 | y |
| 10 | 11 | 13 | 12 | y |
| 11 | 4 | 2 | 20 | n |
| 12 | 4 | 2 | 19 | n |
| 12 | 10 | 3 | 12 | n |
| 14 | 6 | 12 | 8.5 | n |

# Four of the trials were catch trials for data quality control. n, no; y, yes.
